# Supplementary material
Source: publisher figshare collection journal article supplement (https://tandf.figshare.com/ndownloader/files/22120698)
Supplement: Supplementary file 1 [file 22120698]

**SUPPLEMENTARY MATERIAL**

Supplementary data: Available at <http://lilab2.sysu.edu.cn/ncrpheno/suppl.jsp>
